# Supplementary material for: Effect of Electroacupuncture on Insomnia in Patients With Depression: A Randomized Clinical Trial
Source: PubMed Central journal article supplement (PMC9264041; doi:10.1001/jamanetworkopen.2022.20563), 2022-07-07
Supplement: jamanetwopen-e2220563-s00.pdf [file jamanetwopen-e2220563-s00.pdf]

## Data Sharing Statement

Yin. Effect of Electroacupuncture on Insomnia in Patients With Depression. *JAMA Netw Open*. Published July 07, 2022. doi:10.1001/jamanetworkopen.2022.20563

### Data

**Data available:** Yes

**Data types:** Deidentified participant data

**How to access data:** Send request email to Professor Shifen Xu: [xu\\_teacher2006@126.com](mailto:xu_teacher2006@126.com)

**When available:** With publication

### Supporting Documents

**Document types:** None

### Additional Information

**Who can access the data:** Researchers whose proposed use of the data has been approved

**Types of analyses:** For a specified purpose

**Mechanisms of data availability:** After approval of a proposal, and with a signed data access agreement
