# Supplementary material for: Effect of Electroacupuncture on Insomnia in Patients With Depression: A Randomized Clinical Trial
Source: PubMed Central journal article supplement (PMC9264041; doi:10.1001/jamanetworkopen.2022.20563), 2022-07-07
Supplement: jamanetwopen-e2220563-s001.pdf [file jamanetwopen-e2220563-s001.pdf]

1 **The efficacy and safety of electroacupuncture on treating depression**  
2 **related insomnia: a randomized controlled trial**

3

4

5

6

7

8

9

10 **Study Protocol**

11

12

13

14

15

16

17

18

19 **Shanghai Municipal Hospital of Traditional Chinese Medicine**

20 **Shanghai Mental Health Center**

21 **Changhai Hospital**

22

## 23 **1. Background**

24 Depression and its related sleep disorders are becoming serious public health problems affecting  
25 people worldwide. The global point prevalence of MDD is 4.7%<sup>1</sup>, and the estimation of a 12-month  
26 cumulative incidence of depression in China is 5.23%<sup>2</sup>, causing an urgent need to improve depressive  
27 patients' health. Sleeping disorders including insomnia, hypersomnia and pavor nocturnus occur  
28 frequently in patients with depression<sup>3</sup>. Insomnia may occur in 60-80% of patients with major  
29 depressive disorders<sup>4</sup>; it is one of the most frequent residual symptoms of depression<sup>5</sup>, and may persist  
30 even after depressive mood symptoms have been relieved<sup>6</sup>.

31 Insomnia is characterized by persistent dissatisfaction with sleep quantity or quality for at least 4  
32 weeks, with specific complaints of difficulty falling asleep, frequent nighttime awakenings, and/or  
33 awakening earlier in the morning than desired<sup>7</sup>. Insomnia may be triggered by different factors  
34 including psychiatric disorders, organic diseases and the intake of drugs or alcohol<sup>8</sup>. In fact, depressive  
35 symptoms are the largest and most consistent risk factors for insomnia because it affects the normal  
36 sleep-wake cycle<sup>9,10</sup>. Previous meta-analysis indicated moderate to large effect size (ES) improvement  
37 in depression as measured with the Hamilton Depression Rating Scale (ES = -1.29, 95%CI [-2.11,  
38 -0.47]), supporting that treating insomnia by Cognitive Behavioral Therapy for Insomnia (CBT-I) in  
39 patients with depression is effective and also have a positive effect on mood<sup>11,12</sup>. With regard to the  
40 current medical conditions in China, the need for CBT-I for patients with depression cannot be met.  
41 Although selective serotonin reuptake inhibitors (SSRIs) and barbiturates have considerably improved  
42 the efficacy and prognosis in the treatment of comorbid depression with insomnia, their side effects  
43 such as nausea, vomiting, tolerance, addiction, excessive sedation and neurological toxicity cannot be  
44 ignored<sup>13-15</sup>. What makes the pharmacotherapy more difficult is that some antidepressant drugs may  
45 worsen insomnia or cause daytime sleepiness<sup>16</sup>, and high hypnotic dosages for insomnia is closely  
46 associated with worsened depressive outcomes<sup>17</sup>. In these cases, a drug-free alternative intervention is  
47 urgently needed as an effective and safe therapeutic approach for treating insomnia and depression.

48 Our previous study about acupuncture for primary insomnia demonstrated that acupuncture is an  
49 effective treatment to improve patients' sleep efficacy, prolong total sleep time and relieve patients'  
50 depressive mood<sup>18</sup>. The preliminary result of our pilot study<sup>19</sup> about the effect of electroacupuncture  
51 (EA) for depression related insomnia showed that the Pittsburgh Sleep Quality Index (PSQI) score in  
52 depression patients with electroacupuncture treatment obviously decreased (from 16.47±1.89 to  
53 9.83±3.11), and there was significant difference between EA and sham EA (p<0.01). Meta-analysis  
54 also suggested that acupuncture combined with SSRIs is an effective and well-tolerated therapy for  
55 depression and adverse effects of antidepressants<sup>20</sup>. However, other studies showed that acupuncture is  
56 not significantly effective in relieving residual insomnia associated with depression<sup>21,22</sup>. As a result,  
57 randomized clinical trials in high quality are needed to evaluate the clinical effects and long-term  
58 effectiveness of acupuncture in the treatment of depression related insomnia.

## 59 **2. Study aims**

60 We planned this patient-blinded, multi-center, randomized and controlled trial with a sufficient  
61 observation period in three healthcare centers in Shanghai, China. We aim to observe the effects of EA  
62 treatment on sleep status, and eliminate the possible placebo effect by setting reasonable sham methods.  
63 The results will help to demonstrate if EA is an effective and safe therapy for improving sleep quality  
64 in patients with depression.

65

66 **3. Design and Methods**

67 **3.1 Design**

68 This is a multi-center, patient-assessor-blinded, randomized and controlled trial, aimed at evaluating  
 69 the efficacy and safety of electroacupuncture for insomnia in depression patients and comparing the  
 70 effects between electroacupuncture plus standard care, sham acupuncture plus standard care and simple  
 71 standard care.

72 The trial will be performed in three healthcare centers in Shanghai: the acupuncture department in  
 73 Shanghai Municipal Hospital of Traditional Chinese Medicine, the acupuncture department in  
 74 Changhai Hospital of Shanghai and the therapeutic department in Shanghai Mental Health Center. We  
 75 will recruit 270 patients who meet the inclusion criteria and randomly assign them to one of 3 groups,  
 76 receiving electroacupuncture, sham acupuncture and/or standard medical care. After a week baseline,  
 77 participants will enter an 8-month observation period in this trial. All treatments will be given 3 times a  
 78 week (every other day) for 8 weeks. Participants will be assessed at the following time points: the  
 79 baseline (1 week before treatment), the middle of the treatment (4 weeks after treatment starts), the end  
 80 of the treatment (8 weeks after treatment starts) and follow-up (1 month, 3 months and 6 months after  
 81 treatment finishes). All participants will complete the assessments by the PSQI, Actigraphy, HAMD,  
 82 SAS and TESS (detailed trial process seen in Table 1). We will follow the Standards for Reporting  
 83 Interventions in Clinical Trials of Acupuncture (STRICTA) <sup>23</sup> throughout the trial.

84 **Table 1 Trial process chart**

|                           | <b>Baseline</b> | <b>Treatment period</b> |           |           | <b>Follow-up period</b> |            |            |
|---------------------------|-----------------|-------------------------|-----------|-----------|-------------------------|------------|------------|
|                           | Week<br>-1      | Week<br>0               | Week<br>4 | Week<br>8 | Week<br>12              | Week<br>20 | Week<br>32 |
| <b>Patients</b>           |                 |                         |           |           |                         |            |            |
| Enrollment                | ×               |                         |           |           |                         |            |            |
| Signed informed consent   | ×               | ×                       |           |           |                         |            |            |
| Medical history           | ×               |                         |           |           |                         |            |            |
| Medical history           | ×               |                         |           |           |                         |            |            |
| Randomization             |                 | ×                       | ×         | ×         |                         |            |            |
| Intervention              |                 |                         |           |           |                         |            |            |
| <b>Primary outcomes</b>   | ×               |                         | ×         | ×         | ×                       | ×          | ×          |
| PSQI                      |                 |                         |           |           |                         |            |            |
| <b>Secondary outcomes</b> | ×               |                         | ×         | ×         |                         |            |            |
| Actigraphy                | ×               |                         | ×         | ×         | ×                       | ×          | ×          |
| HAMD                      | ×               |                         | ×         | ×         |                         |            |            |
| SAS                       |                 |                         | ×         | ×         | ×                       | ×          | ×          |
| TESS                      | ×               |                         | ×         | ×         | ×                       | ×          | ×          |
| Drug dose record          |                 |                         | ×         | ×         | ×                       | ×          | ×          |
| Patients' compliance      |                 |                         |           |           |                         |            |            |

85

86 **3.2 Randomization and blinding**

87 An online random allocation system will be designed by the central randomization system with a 1:1:1

88 ratio, using the Pocock and Simon minimization method 26. Staff of Shanghai BioGuider Medicinal  
89 Technology Co. Ltd (No. 2277 Zuchongzhi Road, Pudong New District, Shanghai) established the Data  
90 Analysis System (DAS) for the Electronic Data Capture (EDC) 5.0 system and prepared the  
91 randomization database. They offered technical support for the central randomization service and are  
92 not connected with the study. The system is based on the IIS (Internet Information Server) 5.0 as the  
93 Web Server, the SQL Server 2000 as the Database server and the ASP (Active Server Page) as the  
94 scripting language <sup>24</sup>. Central randomization has strict limits of authority; only researchers and the  
95 specialists from the Data and Safety Monitoring Board (DSMB) in this trial have access to the system.  
96 If the participant meets the inclusion criteria and agrees to join in the trial, a researcher who is not  
97 involved in the intervention in each healthcare center will login in to the central randomization system  
98 with his own username and password, enter the participant's personal information, and then get the  
99 randomized number and the group assignment. The patients' personal information will be protected and  
100 keep confidential to the acupuncturists and the assessors before, during and after the trial.

101 We will conduct a patient-assessor-blinded trial where participants are not aware of their group  
102 assignments and acupuncturists will not be involved in the outcome assessment or data analysis.  
103 Participants will be informed that they have an equal chance of allocation to the three groups.  
104 Participants who are assigned to the electroacupuncture (EA) or sham electroacupuncture (SA) will be  
105 treated in a closed unit to avoid communication. Furthermore, they will be asked to wear eye masks  
106 before and during the trial. Since there are inserted needles around participants' wrist joints, they will  
107 not be able to move their hands easily and cannot take off the eye masks. With these methods,  
108 participants will not be aware of the difference between EA and SA. To test the success of blinding, all  
109 participants in three centers will be asked by their acupuncturists whether they received EA or SA  
110 treatment at the end of treatment. Except the acupuncturists, other researchers including the statisticians,  
111 outcome assessors and data analysts are all blinded to the group assignments. All researchers will  
112 receive training on the specifications of this research method before the trial and strictly adhere to the  
113 task separation principle.

114 The flowchart of this trial is shown in Figure 1.

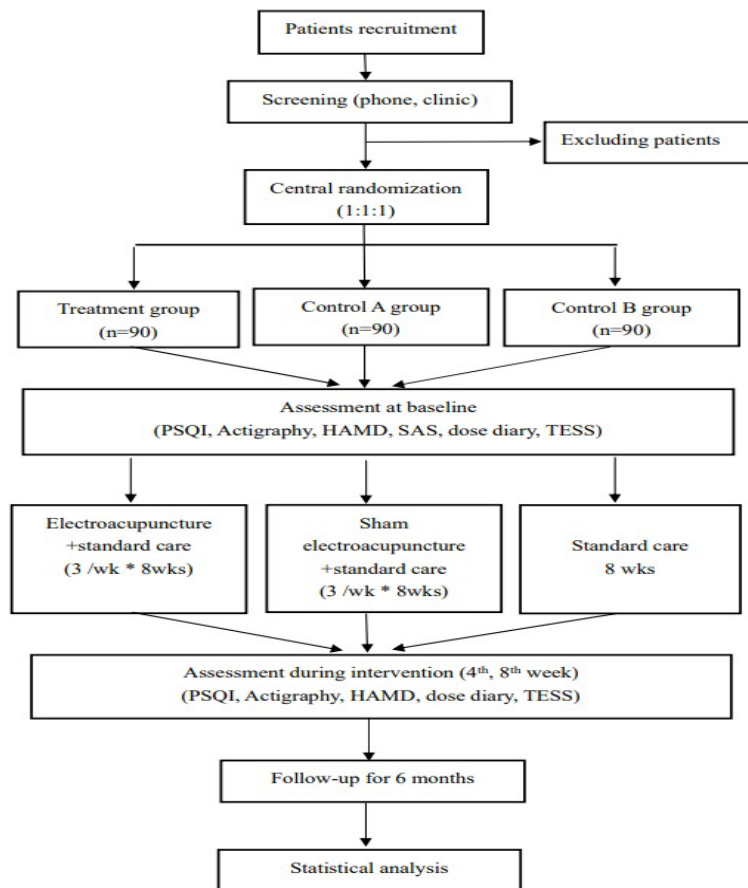

Figure 1

115

### 116 3.3 Patients

117 The study will include a total of 270 depression patients with insomnia. To ensure the precision of the  
 118 results, we developed the following eligibility criteria.

#### 119 3.3.1 Inclusion criteria

120 Participants meeting the following criteria will be included:

- 121 1. Male or female participants aged 18-70;
- 122 2. Participants who meet the diagnostic criteria of depression according to the Diagnostic and  
 123 Statistical Manual of Mental Disorders, Fifth Edition (DSM-V) <sup>25</sup>;
- 124 3. Participants whose HAMD score is 20-35 (mild to moderate depression);
- 125 4. Participants who have taken the same antidepressants for more than 4 weeks or have not taken  
 126 antidepressants;
- 127 5. Participants who complained about insomnia during first screening;
- 128 6. Participants whose PSQI score is more than 7;
- 129 7. Participants who have not received acupuncture treatment for at least one year;
- 130 8. Participants who voluntarily agree with the investigation and sign a written informed consent  
 131 form for the clinical trial.

#### 132 3.3.2 Exclusion criteria

133 Participants who report any of the following conditions will be excluded:

- 134 1. Participants with secondary depressive disorders caused by organic diseases, medicine, or

- 135 psychotic disorders;
- 136 2. Participants who are in the depressive episode of bipolar disorder, or suffering from dysthymia,
- 137 reactive depression and depressive syndrome caused by other diseases;
- 138 3. Participants who had severe diseases of cardiovascular or hematopoietic system, or had severe
- 139 hepatic or renal insufficiency;
- 140 4. Participants with alcohol abuse or drug dependence;
- 141 5. Participants who refuse to wear the Actigraphy during the trial;
- 142 6. Pregnant or lactating women.

### 143 3.4 Recruitment

144 The participants will be recruited through hospital-based advertisements from outpatient clinics and  
 145 from official websites of all three healthcare centers. If depression patients have interest in participating  
 146 in the trial, they can take the phone screening first and then will be asked for face-to-face screening in  
 147 any of the three healthcare centers where they need to fill in some forms with guidance from  
 148 psychologists or doctors with professional training. Participants then will be asked to wear a wrist  
 149 actigraphy to monitor their sleep quality for 3 days. Once the participants meet the inclusion criteria,  
 150 they will be asked to sign the written informed consent form before intervention begins.

### 151 3.5 Sample size calculation

152 The sample calculation is based on changes in the primary outcome of this trial, the Pittsburgh Sleep  
 153 Quality Index (PSQI) score. In our previous trial, we also used PSQI score as the primary outcome to  
 154 evaluate and compare the effects between acupuncture, superficial acupuncture at sham points and  
 155 sham acupuncture on treating depression related insomnia<sup>26</sup>. According to the preliminary results, the  
 156 PSQI score of the acupuncture group at the end of the 8 weeks' intervention was  $9.83 \pm 3.11$  and that of  
 157 the sham acupuncture group was  $13.93 \pm 3.22$ . We assumed 0.2 of the PSQI difference is the superior  
 158 effect.

159  $H_0: A-B \leq \Delta$  but  $H_1: A-B > \Delta$

160 We used the following formula to calculate the sample size in this trial:

161 
$$N = \left[ \frac{(Z_{\alpha} + Z_{\beta}) \sigma}{\delta - \Delta} \right]^2 \times 2$$
, where  $\delta$  is the difference between group,  $\Delta$  is the assumed superior effect  
 162 threshold and  $N$  is the estimated sample size of each group.  $\sigma$  is the  $[(S_1^2 + S_2^2) / 2]^{0.5}$

163 According to the previous study<sup>27</sup>, the minimal clinically important difference (MCID) of PSQI is  
 164 about 1.14-1.75. Since there will be a comparison between the Treatment group and the Control A  
 165 group as well as a comparison between the Treatment group and the Control B group, a sample size of  
 166 27 in each group will have a power of 90% to detect the superior effect of 1.5 of PSQI at an  $\alpha$ -value of  
 167 0.025 and a  $\beta$ -value of 0.1. Assuming a 10% dropout rate, a sample size of 30 for each group is needed.  
 168 For a better power and quality control among centers, we decided the recruiting sample size to 30 for  
 169 each group in each healthcare center. As a result, the total number of participants needed to be  
 170 randomized is 270.

### 171 3.6 Intervention

172 Participants in Treatment group and Control A group will receive EA or SA treatment. Participants in  
 173 these two groups will receive 24 sessions of different treatments, 3 times a week for 8 consecutive  
 174 weeks. EA or SA treatment will be performed after skin cleansing, with patients wearing eye masks and  
 175 lying supine. Each treatment will last for 30 minutes. The temperature of the treatment room cannot be  
 176 lower than 25°C.

177 Considering the participants' psychological state, participants in all three groups can continue regular  
 178 administration of antidepressants, sedatives, hypnotics or anxiolytics during the trial. They must record  
 179 the dose, especially when they reduce the amount; and dose escalation will not be allowed unless the  
 180 patient has consulted the psychiatrist. The patients will not be withdrawn the trial by changing the dose  
 181 of the drug.

182 *3.6.1 Treatment group*

183 Participants in the Treatment group will receive electroacupuncture (EA) treatment. The acupuncture  
 184 method of each acupoint is shown in Table 2. The regular acupuncture method will be applied at Baihui  
 185 (GV20), Shenting (GV24), Yintang (GV29), bilateral Anmian (EX-HN22), Shenmen (HT7), Neiguan  
 186 (PC6) and SanYinjiao (SP6). After needle insertion, rotating manipulation or lifting-thrusting  
 187 manipulation will be applied for "Deqi" sensation. Two electrodes of the electro-stimulator (CMNS6-1,  
 188 Wuxi Jiajian Medical Device CO., LTD, China) will be connected to the needles at Baihui (GV20) and  
 189 Yintang (GV29) for 30 minutes, delivering a continuous wave. The frequency will be set to 30 Hz with  
 190 a current intensity of 0.1 to 1 mA during the treatment, based on the tolerance of each patient.

191 *3.6.2 Sham acupuncture group*

192 Participants in the sham acupuncture group will receive sham electroacupuncture treatment at the same  
 193 acupoints as the Treatment group. The acupuncture needles are produced by Asia-med GmbH&Co.KG  
 194 (seen Figure 2), with the same appearance as those used in sham acupuncture treatment. The  
 195 Streitberger Placebo needle<sup>28,29</sup> have been successfully used in our previous study<sup>19,30</sup>. When the tip of  
 196 the blunt needles touches to the skin, the patient will get a pricking sensation but there is no real needle  
 197 inserted into the skin. The electro-stimulator will be set beside the patients and two electrodes will be  
 198 connected to the needles at Baihui (GV20) and Yintang (GV29). Acupuncturists will turn on the  
 199 electro-stimulator, but all indicators will be set to "0". Participants will be informed when removing the  
 200 needles after 30 minutes. Acupuncturists will use dry cotton balls to press the acupoints so that patients  
 201 can feel the withdrawal of the 'needles'.

202 **Table 2 Acupuncture method for each acupoint**

| Acupoints                              | Needling method                                                                                                                                                         | Needle type |
|----------------------------------------|-------------------------------------------------------------------------------------------------------------------------------------------------------------------------|-------------|
| <b>Baihui (GV20), Shenting (GV24)</b>  | The angle between the needle tip and the scalp is 30°. Move the needle tip backward along the anterior-posterior midline, and then insert the needle for about 0.5-1cm. | 0.25*25mm   |
| <b>Yintang (GV29)</b>                  | Pinch the local skin, and then puncture obliquely for about 0.5-1cm.                                                                                                    | 0.25*25mm   |
| <b>Shenmen (HT7)</b>                   | Puncture perpendicularly for about 0.5cm.                                                                                                                               | 0.25*25mm   |
| <b>Anmian (EX-HN22)</b>                | The angle between the needle tip and the scalp is 30°. Puncture perpendicularly for about 1cm.                                                                          | 0.30*40mm   |
| <b>Sanyinjiao (SP6), Neiguan (PC6)</b> | Puncture perpendicularly for about 1cm.                                                                                                                                 | 0.30*40mm   |

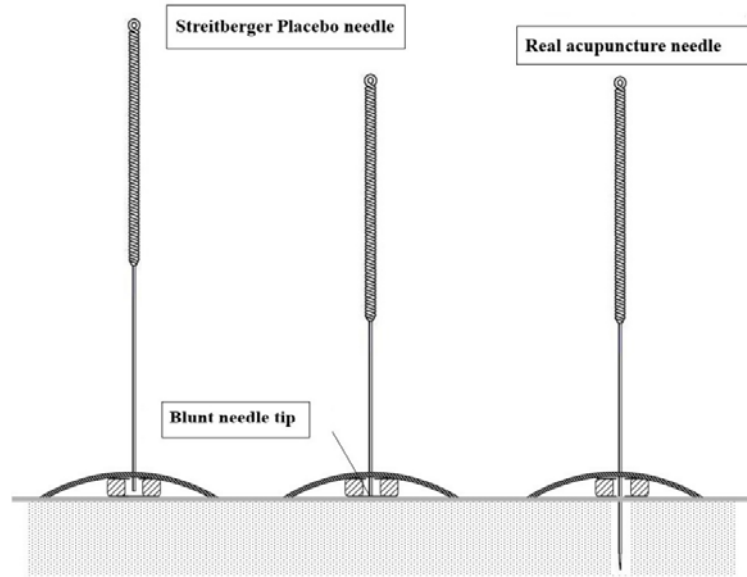

Figure 2

204

205

### 206 3.6.3 Control group

207 Standard care (also known as treatment-as-usual or routine care) in RCTs is frequently employed as the  
 208 control condition to establish if the intervention is a significant improvement over existing practice <sup>31</sup>.

209 In this trial, we set the control group as the standard care group to investigate the differences between  
 210 EA treatment group and the blank control group so that the effects of EA for insomnia and depression  
 211 will be observed more clearly. All 90 participants in three healthcare centers in the control group will  
 212 continue taking in their routine antidepressants and/or sedative-hypnotics as before from baseline to 8  
 213 weeks. During the intervention period, if the patients have changes in their mental state and need help,  
 214 the psychologists in Shanghai Mental Health Center will give professional advices and guidance. After  
 215 finishing all the required scales and actigraphy records, they will get 10 sessions of free acupuncture  
 216 treatment for insomnia.

## 217 3.7 Outcome Measurement

### 218 3.7.1 Primary outcome

219 The Pittsburgh Sleep Quality Index (PSQI) is a widely-used questionnaire with 19 items to assess sleep  
 220 quality and disturbances over a one-month interval <sup>32</sup>. Four open-ended questions are followed by  
 221 closed-ended questions that are rated on a 4-point Likert scale. The scores include the following  
 222 indicators: subjective sleep quality, sleep latency, sleep duration, habitual sleep efficiency, sleep  
 223 disturbances, use of medication, and daytime dysfunction. The accumulated scores of the seven  
 224 indicators constitute the total score (ranging from 0–21). A higher score indicates worse sleep quality  
 225 and more severe sleep disorders.

### 226 3.7.2 Secondary outcomes

227 1. The actigraphy (wActiSleep-BT, LLC, Pensacola, USA) worn on the patient's wrist can monitor the  
 228 sleep quality, such as sleep onset, sleep latency, duration, awakenings during the night, etc. The  
 229 software ActiLife6 (Version 6.8.1, ActiGraph, LLC) will be used to analyze every participant's sleep  
 230 condition recorded in the actigraphy. The indicators used in our trial will be sleep efficiency (SE), sleep  
 231 awakenings (SAW) and total sleep time (TST).



232 2. The Hamilton Rating Scale for Depression (HAMD) is an observer-rating questionnaire with 17  
233 items used to assess the symptoms of patients diagnosed as suffering from depressive states<sup>33</sup>. Each  
234 item is rated in 3- or 5-point scales. A higher total score indicates a higher depression level.

235 3. The Self-rating Anxiety Scale (SAS) is primarily used as a measure of somatic symptoms associated  
236 with anxiety<sup>34</sup>. In using the scale, the participant will be asked to rate each item from 0-3 points  
237 according to how it applies to him or her within the past week. The standard score is the sum of the  
238 integer part of 1.25 times the raw score of the 20 items. A standard score of more than 50 points means  
239 the subject has anxious symptoms. A higher score indicates a more serious case of anxiety.

240 4. The dose diary is a notebook where participants will be required to record their daily dose of  
241 antidepressants or sedative-hypnotics from baseline to 6 months follow-up, as well as the dosage time.

### 242 **3.8 Adverse events**

243 Any adverse events (described as unfavorable or unintended signs, symptoms or diseases occurring  
244 during the trial) related to the administration of antidepressant and sedative-hypnotics must be reported  
245 by patients and practitioners. These adverse events will be recorded in the Treatment Emergent  
246 Symptom Scale (TESS)<sup>35</sup>.

247 For the adverse events related to the acupuncture treatment, the most common ones include bleeding,  
248 faint, bruising ecchymoma, serious pain etc. These AE data will be assessed in terms of severity and  
249 causality, and the incidence will also be determined. The 3-point grading categories will be applied:  
250 grade 1, mild, grade 2, moderate, grade 3, severe or medically significant. The causality categories used  
251 will be certain, probable/likely, possible, unlikely, conditional/unclassified and  
252 unassessable/unclassifiable. The incidence of AEs was presented as the number of AEs per number of  
253 acupuncture sessions (%).

### 254 **3.9 Statistical analysis**

255 The statistical analyst will be blinded to the participants' personal information and their group  
256 assignment during the trial. The primary analysis will be a comparison of the changes of patients' PSQI  
257 score among three groups at 8 weeks after inclusion (comparison of the primary endpoint). The  
258 secondary analysis will be performed to assess the changes of the SE, TST and SA recorded in the  
259 actigraphy, as well as the HAMD scores and SAS scores from baseline to 8 weeks after inclusion. We  
260 will also count the number of patients who increase or decrease the drug dose, and then analyze the  
261 differences among three groups. All analyses will be performed on the intention-to-treat (ITT)  
262 population of participants who have at least one treatment. Missing data will be handled using the  
263 multiple imputation method, on the assumption that values at each time point follow a specific  
264 distribution calculated by the computer software R V.3.5. We will also perform a complete-case  
265 analysis without imputation of missing data, to find out if the results are consistent. Data analyses will  
266 be performed with the use of the statistical software SPSS V.20.0. The *t*-test will be used to compare  
267 the measurement data between either two groups from the baseline to 6 months follow-up; the rank

268 sum test will be used for ranked data while the  $\chi^2$  test will be used to analyze categorical data. The  
269 significance level that will be used for statistical analysis with 2-tailed testing will be 2.5%. Data values  
270 will mainly be presented as Mean±SD.

### 271 **3.10 Ethics and dissemination**

272 All acupuncturists are licensed doctors with 3-5 years of experience in acupuncture treatment; and they  
273 will join in the clinical training before the intervention to ensure the standard real and sham

274 acupuncture operation in three centers. The trial has been approved by the Ethics Committee of  
275 Shanghai Municipal Hospital of Traditional Chinese Medicine, Shanghai, China (2017SHL-KY-04) and  
276 is registered with ClinicalTrials.gov (NCT03122080).

277 To guarantee the quality of the study, this trial will be carried out under the supervision of an  
278 independent DSMB. The DSMB consists of three experts from different fields: Professor Bingshun  
279 Wang in medical statistics from the School of medicine at Shanghai Jiaotong University, Dr. Lin Sun in  
280 psychology from the Department of Geriatrics at Shanghai Mental Health Center, and Professor  
281 Xueyong Shen in acupuncture from the Acupuncture College at Shanghai University of Traditional  
282 Chinese Medicine. The DSMB works to identify problems in the project, examine collected data, and  
283 control bias. Researchers in each healthcare center will promptly input data on the website  
284 (<https://ecdm2.drugchina.net/crct2/>) so that members in the DSMB can supervise the process at any  
285 time. Once they find problems or serious adverse events during the intervention, they can raise  
286 objections directly and even stop the trial until the problem has been resolved. Meanwhile, a qualified  
287 clinical trial expert (Lixing Lao) will be invited to monitor this study.

288 The results of this study will be published in peer-reviewed journals or presented at academic  
289 conferences.

#### 290 **4. Discussion**

291 Acupuncture has been used to treat insomnia and some mental disorders since antiquity in China.  
292 According to the theory of traditional Chinese medicine, acupuncture provides balance to the body by  
293 stimulating specific acupoints, helping the body to achieve a state of relative equilibrium (the harmony  
294 of “*yin-yang*”), thereby restoring the normal sleep-wake cycle. Recent systematic reviews indicate that  
295 acupuncture could be an alternative therapy to medication for treating insomnia but needs further  
296 studies using large samples and a rigorous study design to confirm its role<sup>36,37</sup>.

297 Previous RCTs always focus on either the acupuncture treatment for insomnia or that for depression,  
298 ignoring the relationship between these two diseases. Insomnia has been identified as the most common  
299 sleep disorder comorbid to depressive disorders<sup>38</sup>; so a reasonable acupuncture treatment program  
300 should be developed to normalize sleep disturbance and to relieve depressive mood as well. At the time  
301 of this writing, there are no similar RCTs about acupuncture for insomnia in depression patients that  
302 included a large sample size and were conducted in multiple healthcare centers. Our trial intends to  
303 present a strictly designed trial to study the effects of EA on insomnia in depression patients and to  
304 overcome some existing limitations, including illogical design, imperfect blinding method and practical  
305 difficulties in previous acupuncture clinical researches. With a long follow-up period, we will be able to  
306 explore the persistent effects of acupuncture for insomnia and determine for how long the therapeutic  
307 effect will last.

308 For patients in the EA group, we decided to use EA at Baihui (GV20) and Yintang (GV29), with the  
309 frequency set to 30 Hz during the treatment. According to the TCM theory, GV20 is the convergent  
310 point of six yang meridians as well as the foot Jueyin meridian; it is located on the top of the head,  
311 governs yang qi of the body and is the key point of calming mind. GV29 promotes the circulation of qi  
312 and blood in the head and restores the function of brain. EA at GV20 and GV29 enhances the effect of  
313 soothing nerves. In addition, a functional connectivity MRI (fcMRI) study suggested that EA at GV20  
314 and GV29 may have effect on mental disorders<sup>39</sup>. Using fcMRI to identify the key cerebral functional  
315 region affected by EA at GV20 and GV29 found that the center of the cerebral network changed from  
316 the caudate nucleus to the parahippocampal gyrus and hypothalamus. The network centered on the

317 parahippocampal gyrus and hypothalamus primarily functioned in somatic movement, sensation, vision,  
318 hearing and language. This finding may indicate a mechanism for treating depression using EA at  
319 GV20 and GV29.

320 A frequency-specific neurochemical response in the central nervous system may be related to  
321 differential response of the body to low- and high-frequency EA stimulation and different peripheral  
322 and central pathways<sup>40</sup>. Previous research found that low frequency EA could be useful in clinical  
323 settings to manage pain<sup>41</sup> while high-frequency stimulation has more potent effects on 5-HT activity<sup>42</sup>.  
324 Thirty Hz separates the continuous wave of the electro-stimulator from disperse wave to dense wave  
325 and we chose 30Hz based on an acupuncture textbook<sup>43</sup>.

326 Considering the complicated mental state of depression patients with insomnia, we will apply  
327 standard medication instead of unified antidepressants or sedative-hypnotics in this trial. Participants in  
328 all groups will continue taking in their individual routine dosage from baseline to 6 months follow-up.  
329 If their conditions obviously change during the study, they will be free to consult our psychologists  
330 from Shanghai Mental Health Center to adjust the dose. The use of standard care control groups has  
331 been the subject of much debate, with some pointing out that what constitutes standard care is unclear  
332<sup>44 45</sup>. For better implementation of the standard care, researchers in our trial will try to carry out proper  
333 health education for all patients and supervise them in recording their daily medication dosage.

334 As a multi-center RCT conducted in a first-tier city, our study can provide more representative  
335 results about the role and value of acupuncture as a complementary and alternative therapy for  
336 insomnia and depressive moods than other single-center RCTs.

337 Considering the high prevalence of insomnia and depression in rural areas in China<sup>46 47</sup>, the correlated  
338 heavy economic burden and serious public health problems cannot be underestimated. In future studies,  
339 the focus might be on the acupuncture treatment for insomnia in nationwide healthcare centers.

340

## 341 **References**

- 342 1. Ferrari AJ, Somerville AJ, Baxter AJ, et al. Global variation in the prevalence and incidence of major  
343 depressive disorder: a systematic review of the epidemiological literature. *Psychological*  
344 *Medicine* 2013;43(3):471-81.
- 345 2. Chin WY, Wan EY, Choi EP, et al. The 12-Month Incidence and Predictors of PHQ-9-Screened  
346 Depressive Symptoms in Chinese Primary Care Patients. *Annals of Family Medicine*  
347 2016;14(1):47-53.
- 348 3. Luca A, Luca M, Calandra C. Sleep disorders and depression: brief review of the literature, case  
349 report, and nonpharmacologic interventions for depression. *Clinical Interventions in Aging*  
350 2013;8(default):1033-38.
- 351 4. Winokur A, Gary KA, Rodner S, et al. Depression, sleep physiology, and antidepressant drugs.  
352 *Depression & Anxiety* 2001;14(1):19-28.
- 353 5. Nelson JC, Portera L, Leon AC. Residual symptoms in depressed patients after treatment with  
354 fluoxetine or reboxetine. *Journal of Clinical Psychiatry* 2005;66(11):1409-14.
- 355 6. Urrila AS, Karlsson L, Kiviruusu O, et al. Sleep complaints in adolescent depression: one year  
356 naturalistic follow-up study. *Bmc Psychiatry* 2014;14(1):283.
- 357 7. Medicine AAOS. International Classification of Sleep Disorders: Diagnostic and Coding Manual.  
358 *Chest* 2000;41(1):160-60.
- 359 8. Riemann D, Voderholzer U. Primary insomnia: a risk factor to develop depression? *Journal of*

- 360 *Affective Disorders* 2003;76(1-3):255.
- 361 9. MM O, T R. Place of chronic insomnia in the course of depressive and anxiety disorders. *J Psychiatr*  
362 *Res* 2003;37(1):9-15.
- 363 10. Ohayon MM, Caulet M, Lemoine P. Comorbidity of mental and insomnia disorders in the general  
364 population. *Comprehensive Psychiatry* 1998;39(4):185-97.
- 365 11. Gebara MA, Siripong N, DiNapoli EA, et al. Effect of insomnia treatments on depression: A  
366 systematic review and meta-analysis. *Depression and anxiety* 2018 doi: 10.1002/da.22776  
367 [published Online First: 2018/05/22]
- 368 12. Trauer JM, Qian MY, Doyle JS, et al. Cognitive Behavioral Therapy for Chronic Insomnia: A  
369 Systematic Review and Meta-analysis. *Annals of Internal Medicine* 2013;47(2):191-204.
- 370 13. Wilson K, Mottram P. A comparison of side effects of selective serotonin reuptake inhibitors and  
371 tricyclic antidepressants in older depressed patients: a meta-analysis. *International Journal of*  
372 *Geriatric Psychiatry* 2004;19(8):754-62.
- 373 14. PRESKORN, Sheldon H. The Adverse Effect Profiles of the Selective Serotonin Reuptake Inhibitors:  
374 Relationship to In Vitro Pharmacology. *Journal of Psychiatric Practice* 2000;6(3):153-57.
- 375 15. Chung KH, Li CY, Kuo SY, et al. Risk of psychiatric disorders in patients with chronic insomnia and  
376 sedative-hypnotic prescription: a nationwide population-based follow-up study. *Journal of*  
377 *Clinical Sleep Medicine Jcsm Official Publication of the American Academy of Sleep Medicine*  
378 2015;11(5):543-51.
- 379 16. WA SM, PR B, PL C, et al. Sedative antidepressants and insomnia. *Revista Brasileira de Psiquiatria*  
380 2011;33(1):91-5.
- 381 17. Li CT, Bai YM, Lee YC, et al. High dosage of hypnotics predicts subsequent sleep-related breathing  
382 disorders and is associated with worse outcomes for depression. *Sleep* 2014;37(4):803-09.
- 383 18. Yin X, Gou M, Xu J, et al. Efficacy and safety of acupuncture treatment on primary insomnia: a  
384 randomized controlled trial. *Sleep Medicine* 2017;37:193-200.
- 385 19. Yin X, Xu J, Dong B, et al. Efficacy and Safety of Electroacupuncture on Treating Depression Related  
386 Sleep Disorders: Study Protocol of a Randomized Controlled Trial. *Evidence-Based*  
387 *Complementary and Alternative Medicine*, 2016, (2016-12-29) 2016;2016(3):1069597.
- 388 20. Chan YY, Lo WY, Yang SN, et al. The benefit of combined acupuncture and antidepressant  
389 medication for depression: A systematic review and meta-analysis. *J Affect Disord*  
390 2015;176:106-17. doi: 10.1016/j.jad.2015.01.048 [published Online First: 2015/02/24]
- 391 21. Yeung WF, Chung KF, Tso KC, et al. Electroacupuncture for residual insomnia associated with major  
392 depressive disorder: a randomized controlled trial. *Sleep* 2011;34(6):807-15.
- 393 22. Chung KF, Yeung WF, Yu YM, et al. Acupuncture for residual insomnia associated with major  
394 depressive disorder: a placebo- and sham-controlled, subject- and assessor-blind,  
395 randomized trial. *The Journal of clinical psychiatry* 2015;76(6):e752.
- 396 23. Hugh MP, Altman DG, Richard H, et al. Revised Standards for Reporting Interventions in Clinical  
397 Trials of Acupuncture (STRICTA): Extending the CONSORT Statement. *Journal of Integrative*  
398 *Medicine* 2010;8(9):35-46.
- 399 24. Uher R, Payne JL, Pavlova B, et al. Major depressive disorder in DSM-5: implications for clinical  
400 practice and research of changes from DSM-IV. *Depression and anxiety* 2014;31(6):459-71.  
401 doi: 10.1002/da.22217 [published Online First: 2013/11/26]
- 402 25. Taoying L, Yan L, Jiyang P, et al. Study on Minimal Important Difference of the Pittsburgh Sleep

- 403           Quality Index Based on Clinical Trial of Traditional Chinese Medicine. *Journal of Guangzhou*  
404           *University of Traditional Chinese Medicine* 2013;30(4):574-78.
- 405 26. Pocock SJ, Simon R. Sequential treatment assignment with balancing for prognostic factors in the  
406           controlled clinical trial. *Biometrics* 1975;31(1):103.
- 407 27. Cai H, Xia J, Xu D, et al. A random allocation system using minimization method on Internet.  
408           *Journal of The Fourth Military Medical University* 2004;25(14):1278-80.
- 409 28. K S, J K. Introducing a placebo needle into acupuncture research. *Lancet (London, England)*  
410           1998;352(9125):364.
- 411 29. Kleinhenz J, Streitberger K, Windeler J, et al. Randomised clinical trial comparing the effects of  
412           acupuncture and a newly designed placebo needle in rotator cuff tendinitis. *Pain*  
413           1999;83(2):235-41. [published Online First: 1999/10/27]
- 414 30. Yin X, Gou M, Xu J, et al. Efficacy and safety of acupuncture treatment on primary insomnia: a  
415           randomized controlled trial. *Sleep Medicine* 2017
- 416 31. Freedland KE, Mohr DC, Davidson KW, et al. Usual and Unusual Care: Existing Practice Control  
417           Groups In Randomized Controlled Trials of Behavioral Interventions. *Psychosomatic Medicine*  
418           2011;73(4):323-35.
- 419 32. Buysse DJ, Rd RC, Monk TH, et al. The Pittsburgh Sleep Quality Index: a new instrument for  
420           psychiatric practice and research. *Psychiatry Research* 1989;28(2):193-213.
- 421 33. Hamilton M. The Hamilton Rating Scale for Depression: Springer Berlin Heidelberg 1986.
- 422 34. Zung WWK. A Rating Instrument For Anxiety Disorders. *Psychosomatics* 1971;12(6):371-79. doi:  
423           10.1016/s0033-3182(71)71479-0
- 424 35. Institute of Mental Health N. TESS (Treatment Emergent Symptom Scale-Write-in)1985.
- 425 36. Lee SH, Lim SM. Acupuncture for insomnia after stroke: a systematic review and meta-analysis.  
426           *Bmc Complementary & Alternative Medicine* 2016;16(1):228.
- 427 37. Dong B, Chen Z, Yin X, et al. The Efficacy of Acupuncture for Treating Depression-Related Insomnia  
428           Compared with a Control Group: A Systematic Review and Meta-Analysis. *BioMed Research*  
429           *International,2017,(2017-02-14)* 2017;2017(6):9614810.
- 430 38. Buysse DJ, Angst J, Gamma A, et al. Prevalence, course, and comorbidity of insomnia and  
431           depression in young adults. *Sleep* 2008;31(4):473-80.
- 432 39. Zhang G, Qu S, Zheng Y, et al. Key regions of the cerebral network are altered after  
433           electroacupuncture at the Baihui (GV20) and Yintang acupuncture points in healthy  
434           volunteers: an analysis based on resting fMRI. *Acupuncture in medicine : journal of the*  
435           *British Medical Acupuncture Society* 2013;31(4):383-8. doi: 10.1136/acupmed-2012-010301  
436           [published Online First: 2013/07/28]
- 437 40. Zhang ZJ, Wang XM, Mcalonan GM. Neural acupuncture unit: a new concept for interpreting  
438           effects and mechanisms of acupuncture. *Journal of Integrative Medicine*  
439           2014;2012(3):429412.
- 440 41. Zhang R, Lao L, Ren K, et al. Mechanisms of acupuncture-electroacupuncture on persistent pain.  
441           *Anesthesiology* 2014;120(2):482-503.
- 442 42. Kwon Y-b, Kang M-s, Son S-s, et al. Different Frequencies of Electroacupuncture Modified the  
443           Cellular Activity of Serotonergic Neurons in Brainstem. *American Journal of Chinese Medicine*  
444           2000;28(03n04):435-41.
- 445 43. Fang J. Acupuncture and Moxibustion Technique. Beijing: People's Medical Publishing House

- 446 2012:158.
- 447 44. Burns T. End of the road for treatment-as-usual studies? *British Journal of Psychiatry the Journal of*  
448 *Mental Science* 2009;195(1):5.
- 449 45. Liza D, Zarin DA, Emanuel EJ, et al. Considering Usual Medical Care in Clinical Trial Design. *PLoS*  
450 *Medicine*,6,9(2009-9-29) 2009;6(9):e1000111.
- 451 46. Zhou X, Bi B, Zheng L, et al. The prevalence and risk factors for depression symptoms in a rural  
452 Chinese sample population. *PloS one* 2014;9(6):e99692. doi: 10.1371/journal.pone.0099692
- 453 47. Dai J, Chiu HF, Xiang YT, et al. The prevalence of insomnia and its socio-demographic and clinical  
454 correlates in older adults in rural China: a pilot study. *Aging & Mental Health*  
455 2013;17(6):761-5.
- 456
