# Supplementary material for: Effect of Electroacupuncture on Insomnia in Patients With Depression: A Randomized Clinical Trial
Source: PubMed Central journal article supplement (PMC9264041; doi:10.1001/jamanetworkopen.2022.20563), 2022-07-07
Supplement: jamanetwopen-e2220563-s002.pdf [file jamanetwopen-e2220563-s002.pdf]

## Supplementary Online Content

Yin X, Li W, Liang T, et al. Effect of electroacupuncture on insomnia in patients with depression: a randomized clinical trial. *JAMA Netw Open*. 2022;5(7):e2220563. doi:10.1001/jamanetworkopen.2022.20563

**eFigure.** Location of the Acupoints

**eTable 1.** Seven Components of PSQI Changes

**eTable 2.** Diary of Sedative Dose Change

**eTable 3.** Adverse Events

**eTable 4.** Blinding Result

This supplementary material has been provided by the authors to give readers additional information about their work.

## eFigure. Location of the Acupoints

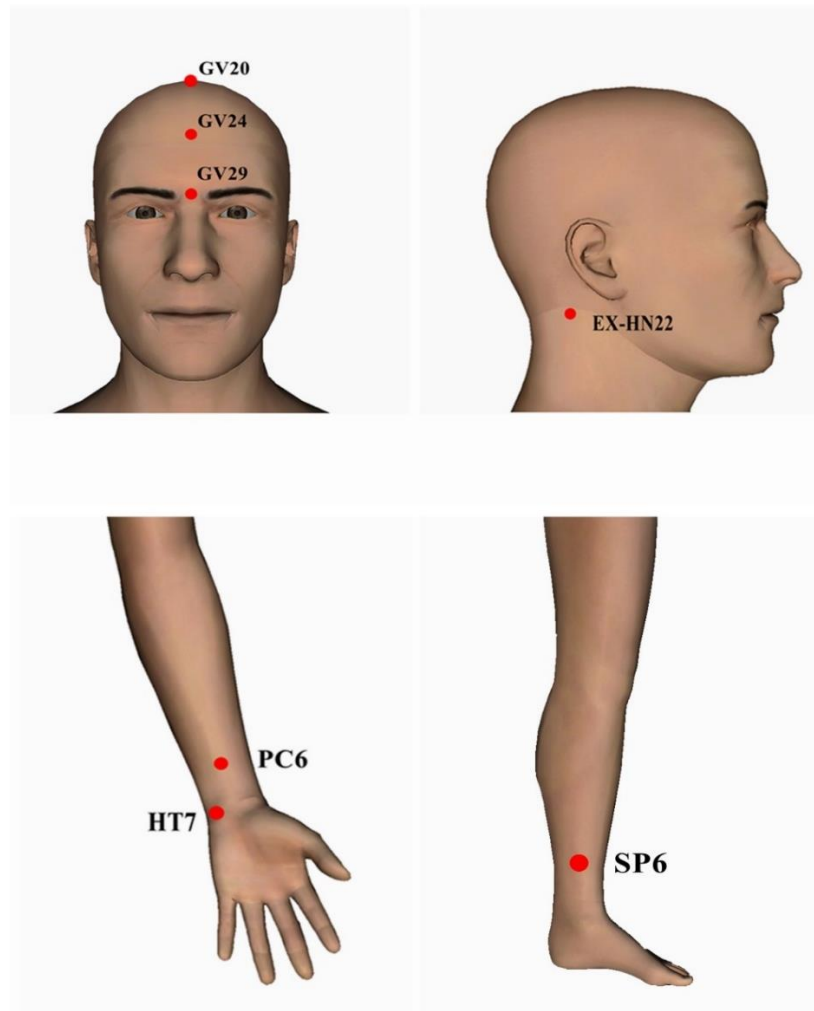

GV20: 5 cun superior to the anterior hairline, on the anterior midline of the head

GV24: 0.5 cun superior to the anterior hairline, on the anterior midline of the head

GV29: At the midpoint between the medial ends of eyebrows.

EX-HN22: At the midpoint between Yifeng (SJ17) and Fengchi (GB20).

PC6: 2 cun above of the transverse crease of the wrist, between the tendons of m. palmaris longus and m. flexor carpi radialis

HT7: On the anterior and medial aspect of the wrist, radial to the flexor carpi ulnaris tendon at the palmar wrist crease.

SP6: On the tibial aspect of the leg, posterior to the medial border of the tibia and 3 cun superior to the prominence of the medial malleolus.

**eTable 1. Seven Components of PSQI Changes**

| Outcomes                         | Mean PSQI scores, (SD) |           |               | EA vs. SA           |                      | EA vs. Control      |                      |
|----------------------------------|------------------------|-----------|---------------|---------------------|----------------------|---------------------|----------------------|
|                                  | EA group               | SA group  | Control group | Difference (95% CI) | P Value <sup>a</sup> | Difference (95% CI) | P Value <sup>a</sup> |
| <b>Sleep quality</b>             |                        |           |               |                     |                      |                     |                      |
| <b>Week 4</b>                    | 1.6 (0.7)              | 1.9 (0.7) | 2.1 (0.8)     | -0.3 (-0.4 to -0.1) | .004                 | -0.4 (-0.6 to -0.2) | <.001                |
| <b>Week 8</b>                    | 1.1 (0.6)              | 1.7 (0.6) | 2.1 (0.7)     | -0.7(-0.8 to -0.5)  | <.001                | -1.0 (-1.2 to -0.8) | <.001                |
| <b>Sleep latency</b>             |                        |           |               |                     |                      |                     |                      |
| <b>Week 4</b>                    | 2.2 (0.9)              | 2.2 (1.0) | 2.6 (0.8)     | -0.2 (-0.4 to 0.0)  | .15                  | -0.4 (-0.6 to -0.2) | <.001                |
| <b>Week 8</b>                    | 2.0 (0.9)              | 2.2 (0.9) | 2.4 (0.8)     | -0.4 (-0.6 to -0.1) | .004                 | -0.5 (-0.7 to -0.3) | <.001                |
| <b>Sleep duration</b>            |                        |           |               |                     |                      |                     |                      |
| <b>Week 4</b>                    | 1.6 (1.0)              | 2.0 (1.0) | 2.1 (1.0)     | -0.4 (-0.6 to -0.2) | <.001                | -0.5 (-0.7 to -0.3) | <.001                |
| <b>Week 8</b>                    | 1.2 (0.9)              | 1.8 (1.0) | 2.0 (1.1)     | -0.5 (-0.8 to -0.3) | <.001                | -0.7 (-0.9 to -0.5) | <.001                |
| <b>Habitual sleep efficiency</b> |                        |           |               |                     |                      |                     |                      |
| <b>Week 4</b>                    | 1.8 (1.0)              | 1.8 (1.1) | 1.9 (1.1)     | -0.2 (-0.4 to 0.1)  | .32                  | -0.2 (-0.4 to 0.0)  | .05                  |
| <b>Week 8</b>                    | 1.2 (0.9)              | 1.7 (1.1) | 1.9 (1.0)     | -0.6 (-0.9 to -0.4) | <.001                | -0.8 (-1.0 to -0.5) | <.001                |
| <b>Sleep disturbance</b>         |                        |           |               |                     |                      |                     |                      |
| <b>Week 4</b>                    | 1.4 (0.5)              | 1.7 (0.6) | 1.8 (0.6)     | -0.2 (-0.4 to -0.1) | .004                 | -0.3 (-0.5 to -0.2) | <.001                |
| <b>Week 8</b>                    | 1.2 (0.4)              | 1.6 (0.6) | 1.7 (0.5)     | -0.3 (-0.5 to -0.2) | <.001                | -0.4 (-0.6 to -0.3) | <.001                |

| <b>eTable 1 Seven Components of PSQI Changes (Continued)</b> |           |           |           |                     |       |                     |       |
|--------------------------------------------------------------|-----------|-----------|-----------|---------------------|-------|---------------------|-------|
| <b>Use of sleeping medication</b>                            |           |           |           |                     |       |                     |       |
| <b>Week 4</b>                                                | 1.6 (1.3) | 1.9 (1.3) | 2.3 (1.2) | -0.3 (-0.5 to -0.1) | .01   | -0.4 (-0.6 to -0.2) | <.001 |
| <b>Week 8</b>                                                | 1.2 (1.3) | 1.8 (1.3) | 2.3 (1.2) | -0.6 (-0.8 to -0.3) | <.001 | -0.8 (-1.1 to -0.5) | <.001 |
| <b>Daytime dysfunction</b>                                   |           |           |           |                     |       |                     |       |
| <b>Week 4</b>                                                | 1.5 (0.8) | 1.8 (0.8) | 1.9 (0.8) | -0.4 (-0.6 to -0.2) | <.001 | -0.5 (-0.7 to -0.4) | <.001 |
| <b>Week 8</b>                                                | 1.0 (0.8) | 1.6 (0.7) | 1.9 (0.9) | -0.6 (-0.8 to -0.4) | <.001 | -0.9 (-1.1 to -0.7) | <.001 |

<sup>a</sup> P value by Bonferroni correction

Abbreviations: PSQI, Pittsburgh Sleep Quality Index; EA, Electroacupuncture; SA, Sham acupuncture.

**eTable 2. Diary of Sedative Dose Change**

|                | EA group (n=15) <sup>a</sup> |                      | SA group (n=18)      |                      | Control group (n=15) |                      |
|----------------|------------------------------|----------------------|----------------------|----------------------|----------------------|----------------------|
|                | Decreased dose n (%)         | Increased dose n (%) | Decreased dose n (%) | Increased dose n (%) | Decreased dose n (%) | Increased dose n (%) |
| <b>Wk0-Wk4</b> | 10 (66.7)                    | 0 (0.0)              | 9 (50.0)             | 4 (22.2)             | 4 (26.7)             | 4 (26.7)             |
| <b>Wk4-Wk8</b> | 3 (20.0)                     | 1 (6.7)              | 5 (27.8)             | 6 (33.3)             | 5 (33.3)             | 3 (20.0)             |

<sup>a</sup> Rest patients kept their regular dose of sedatives.

**eTable 3. Adverse Events**

|                                      | <b>EA group (n=90)</b> | <b>SA group (n=90)</b> | <b>Control group (n=90)</b> |
|--------------------------------------|------------------------|------------------------|-----------------------------|
| <b>AEs, n (%)</b>                    | 7 (7.78)               | 4 (4.44)               | 1 (1.11)                    |
| <b>SAEs, n (%)</b>                   | 0 (0)                  | 0 (0)                  | 0 (0)                       |
| <b>Treatment-emergent AEs, n (%)</b> | 5 (5.56)               | 4 (4.44)               | 0 (0)                       |
| <b>Most frequent AEs</b>             | Hematoma               | Local pain             | None                        |

Abbreviations: AE: Adverse Events; SAE: Severe Adverse Events.

**eTable 4. Blinding Result**

| Group            | Guess (n, %) * |            |            | BANG's BI (95% CI) |
|------------------|----------------|------------|------------|--------------------|
|                  | EA             | SA         | No idea    |                    |
| <b>EA (n=90)</b> | 62 (68.9%)     | 15 (16.7%) | 13 (14.4%) | 0.5 (0.4, 0.7)     |
| <b>SA (n=90)</b> | 56 (62.2%)     | 18 (11.1%) | 16 (17.8%) | -0.4 (-0.6, -0.3)  |

\* Percentages may not sum to 100 due to rounding.

Abbreviations: BI: Blinding Index
